# Supplementary material
Source: Springer Nature journal article supplement (https://www.springermedizin.de/resource/supplementary/12935_2012_373_MOESM6_ESM.pdf/9540392)

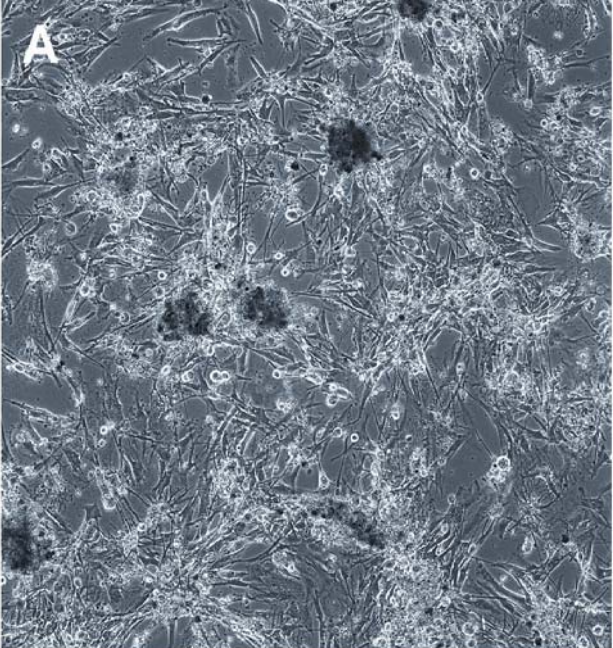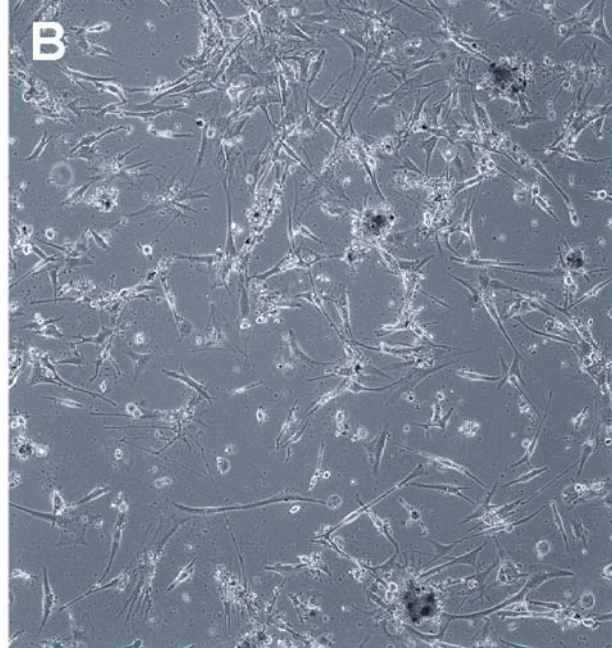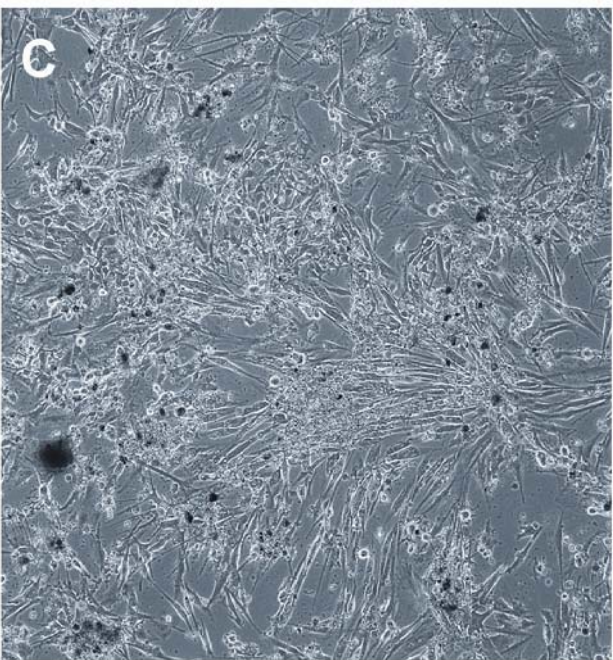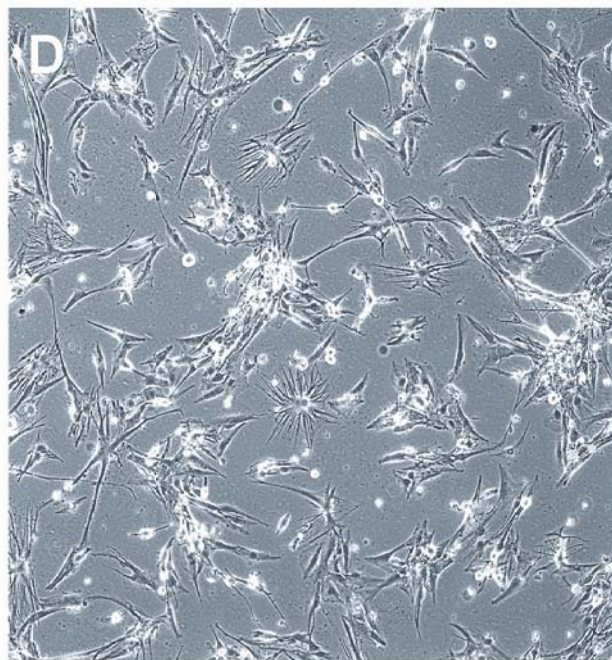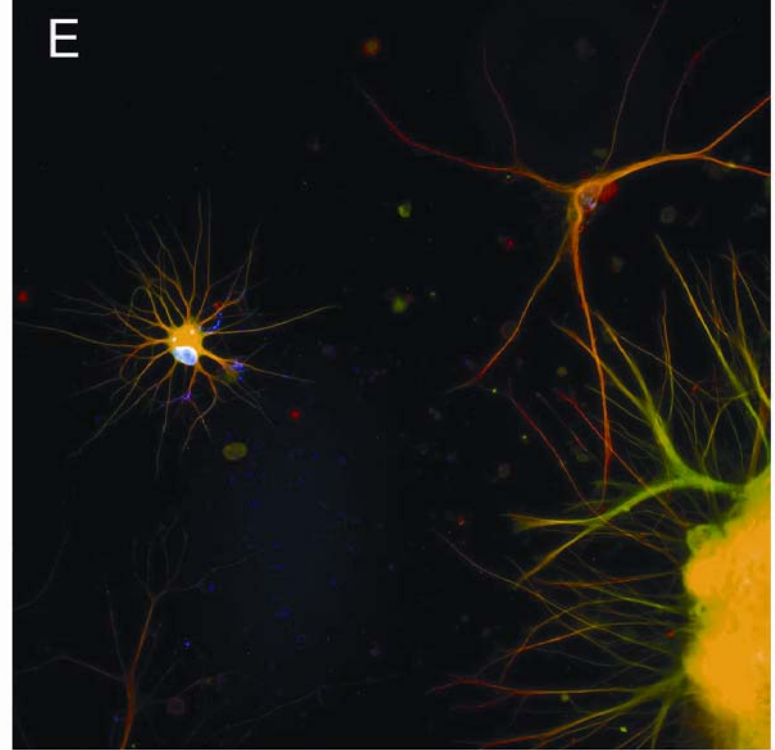

Supplement: MOESM6 [file 9540392]
